# Supplementary material for: A Vaccine Targeting Ovine Herpesvirus 2 Glycoprotein B Protects against Sheep-Associated Malignant Catarrhal Fever
Source: MDPI journal article supplement (doi:10.3390/vaccines10122156), 2022-12-15
Supplement: s1 [file s1]

**Table S1.** Primers and probes used for OvHV-2 and AIHV-1-specific PCR assays.

| Prime/Probe Name     | DNA Sequence (5'-3')                                | Final Reaction Concentration |
|----------------------|-----------------------------------------------------|------------------------------|
| AIHV1-F <sup>1</sup> | gggctaattgtgcagtttgtga                              | 50 nM                        |
| AIHV1-R <sup>1</sup> | aggtgtttctgaaaagaggggaa                             | 300 nM                       |
| AIHV1-P <sup>1</sup> | 6FAM/acaggctcctcgtcctcgtcgtgt/TAMRA                 | 80 nM                        |
| OvHV2-F <sup>2</sup> | tggtaggagcaggctaccgt                                | 240 nM                       |
| OvHV2-R <sup>2</sup> | atcatgctgacccttgacg                                 | 600 nM                       |
| OvHV2-P <sup>2</sup> | 56-FAM/tccacgccg/ZENtccacgccgtccgcactgtaaga/3IABkFQ | 80 nM                        |

<sup>1</sup> AIHV-1 specific qPCR (Traul, et al., 2005, <https://doi.org/10.1016/j.jviromet.2005.05.021>)

<sup>2</sup> OvHV-2 specific qPCR (Hussy, et al., 2001, doi: 10.1128/CDLI.8.1.123-128.2001; Traul, et al., 2007, <https://doi.org/10.1177/104063870701900412>)

**Table S2.** Clinical parameters and outcome following immunization and OvHV-2 challenge.

| Immunogen <sup>1</sup> | Animal ID            | Infection     |    | Clinical Status | OvHV-2 DNA levels <sup>2</sup> / Lesion Score <sup>3</sup> |                        |                         |
|------------------------|----------------------|---------------|----|-----------------|------------------------------------------------------------|------------------------|-------------------------|
|                        |                      | Outcome (DPC) |    |                 | Lung                                                       | Mes. LN                | Liver                   |
|                        | Viremia <sup>2</sup> | Fever         |    |                 |                                                            |                        |                         |
| Experiment 1           |                      |               |    |                 |                                                            |                        |                         |
| DNA+VV(IV)             | 1                    | 21            | 26 | SA-MCF          | 2x10 <sup>4</sup> / +                                      | 3x10 <sup>2</sup> / -  | 2x10 <sup>5</sup> / ++  |
|                        | 2                    | ND            | -  | Healthy         | ND / -                                                     | ND / -                 | ND / -                  |
|                        | 3                    | ND            | -  | Healthy         | ND / -                                                     | ND / -                 | ND / -                  |
|                        | 4                    | ND            | -  | Healthy         | ND / -                                                     | ND / -                 | ND / -                  |
|                        | 5                    | 23            | 33 | SA-MCF          | 4x10 <sup>4</sup> / +                                      | 2x10 <sup>3</sup> / -  | 2x10 <sup>5</sup> / +   |
|                        | 6                    | ND            | -  | Healthy         | ND / -                                                     | ND / -                 | ND / -                  |
|                        | 7                    | ND            | -  | Healthy         | ND / -                                                     | ND / -                 | ND / -                  |
| VV(IV)                 | 11                   | ND            | -  | Healthy         | ND / -                                                     | ND / -                 | ND / -                  |
|                        | 12                   | ND            | -  | Healthy         | ND / -                                                     | ND / -                 | ND / -                  |
|                        | 13                   | 27            | 33 | SA-MCF          | 4x10 <sup>4</sup> / +                                      | 3x10 <sup>3</sup> / -  | 4x10 <sup>4</sup> / +   |
|                        | 14                   | ND            | -  | Healthy         | ND / -                                                     | ND / -                 | ND / -                  |
|                        | 15                   | 21            | 30 | SA-MCF          | 5x10 <sup>4</sup> / +                                      | 1x10 <sup>3</sup> / -  | 4x10 <sup>5</sup> / +++ |
|                        | 16                   | ND            | -  | Healthy         | ND / -                                                     | ND / -                 | ND / -                  |
|                        | 17                   | ND            | -  | Healthy         | ND / -                                                     | ND / -                 | ND / -                  |
| Mock(IV)               | 21                   | 14            | 25 | SA-MCF          | 9x10 <sup>3</sup> / +                                      | 5x10 <sup>3</sup> / -  | 1x10 <sup>5</sup> / ++  |
|                        | 22                   | 29            | 38 | SA-MCF          | 4x10 <sup>3</sup> / +                                      | 7x10 <sup>3</sup> / -  | 5x10 <sup>3</sup> / +   |
|                        | 23                   | 25            | 34 | SA-MCF          | 1x10 <sup>5</sup> / +                                      | 6x10 <sup>3</sup> / -  | 2x10 <sup>4</sup> / ++  |
|                        | 24                   | 19            | 24 | SA-MCF          | 2x10 <sup>5</sup> / +                                      | 4x10 <sup>3</sup> / -  | 2x10 <sup>5</sup> / ++  |
|                        | 25                   | 21            | 28 | SA-MCF          | 7x10 <sup>4</sup> / +                                      | 3x10 <sup>2</sup> / -  | 7x10 <sup>4</sup> / ++  |
|                        | 26                   | 38            | 43 | SA-MCF          | 4x10 <sup>4</sup> / +                                      | 3x10 <sup>3</sup> / -  | 5x10 <sup>4</sup> / +   |
|                        | 27                   | 17            | 22 | SA-MCF          | 3x10 <sup>4</sup> / ++                                     | 2x10 <sup>4</sup> / -  | 6x10 <sup>4</sup> / +++ |
|                        | 28                   | 19            | 24 | SA-MCF          | 2x10 <sup>4</sup> / +                                      | 2x10 <sup>3</sup> / -  | 5x10 <sup>4</sup> / ++  |
|                        | 29                   | 28            | 39 | SA-MCF          | 9x10 <sup>3</sup> / +                                      | 1x10 <sup>3</sup> / -  | 1x10 <sup>4</sup> / +   |
| Experiment 2           |                      |               |    |                 |                                                            |                        |                         |
| VV(IM)                 | 33                   | ND            | -  | Healthy         | ND / -                                                     | ND / -                 | ND / -                  |
|                        | 34                   | ND            | -  | Healthy         | ND / -                                                     | ND / -                 | ND / -                  |
|                        | 35                   | 17            | 27 | SA-MCF          | 1x10 <sup>4</sup> / ++                                     | 2x10 <sup>5</sup> / ++ | 8x10 <sup>4</sup> / ++  |
| Mock(IM)               | 36                   | 26            | 34 | SA-MCF          | 8x10 <sup>4</sup> / +                                      | 2x10 <sup>4</sup> / -  | 1x10 <sup>5</sup> / +   |
|                        | 37                   | 17            | 27 | SA-MCF          | 1x10 <sup>5</sup> / +                                      | 2x10 <sup>4</sup> / -  | 2x10 <sup>5</sup> / ++  |
|                        | 38                   | 20            | 27 | SA-MCF          | 2x10 <sup>5</sup> / ++                                     | 1x10 <sup>4</sup> / -  | 3x10 <sup>5</sup> / +   |

<sup>1</sup> DNA+VV(IV), OvHV-2 gB plasmid (prime and 1<sup>st</sup> booster), delivered in the skin, followed by the AIHV-1<sup>ΔORF73</sup>/OvHV-2-ORF8 chimeric virus delivered by intravenous (IV) injection. VV, AIHV-1<sup>ΔORF73</sup>/OvHV-2-ORF8 chimeric virus delivered by intramuscular (IM) injection. Mock, immunization with uninfected cell culture supernatant.

<sup>2</sup> Detection of OvHV-2 DNA by PCR in blood. OvHV-2 qPCR expressed as OvHV-2 genome copies / 50 ng total (Hussy, et al., 2001, doi: 10.1128/CDLI.8.1.123-128.2001; Traul, et al., 2007, <https://doi.org/10.1177/104063870701900412>).

<sup>3</sup> Histopathological analysis, lesion scores: +, mild; ++, moderate; +++, severe. -, no visible lesion. DPC, days post-challenge; ND, not detected; Mes. LN, mesenteric lymph node.

## References:

Hussy, D.; Stauber, N.; Leutenegger, C.M.; Rieder, S.; Ackermann, M. Quantitative fluorogenic PCR assay for measuring ovine herpesvirus 2 replication in sheep. *Clin. Diagn. Lab Immunol* 2001, 8, 123–128.

Traul, D.L.; Taus, N.S.; Oaks, J.L.; O'Toole, D.; Rurangirwa, F.R.; Baszler, T.V.; Li, H. Validation of non-nested and real-time PCR for diagnosis of sheep-associated malignant catarrhal fever in clinical samples. *J. Vet. Diagn. Investig.* 2007, 19, 405–408.

Traul, D.L.; Elias, S.; Taus, N.S.; Herrmann, L.M.; Oaks, J.L.; Li, H. A real-time PCR assay for measuring alcelaphine herpesvirus-1 DNA. *J. Virol. Methods* 2005, 129, 186–190.
